# Supplementary material for: Proton Compared to X-irradiation Induces Different Protein Profiles in Oral Cancer Cells and Their Derived Extracellular Vesicles
Source: Preprints.org preprint supplement (doi:10.20944/preprints202310.1260.v1), 2023-10-19
Supplement: Supplementary file 2 [file supplementary]

Archive with 1 entries (1 files):
- Supplementary materials.pdf
